# Supplementary material
Source: PubMed Central journal article supplement (PMC3666692)
Supplement: 1217988110_pnas.201217988SI.pdf [file 1217988110_pnas.201217988SI.pdf]

# Supporting Information

Lee et al. 10.1073/pnas.1217988110

## SI Text

**Thermotolerance Assay.** *Saccharomyces cerevisiae* heat shock protein (Hsp) 104 variants and *Escherichia coli* ClpB were cloned into pYS104 (kind gift from Yury Chernoff, Georgia Institute of Technology, Atlanta), which featured Hsp104 under the control of the *Hsp104* promoter, by swapping the *Strep*-tag-containing HindIII fragments or replacing the entire Hsp104 sequence with *E. coli* ClpB. Plasmids were transformed into *S. cerevisiae* OT46 ( $\Delta hsp104$ ) (1). Yeast cells were grown to midlog phase at 25 °C in yeast extract-peptone-dextrose (YPD) medium and divided into two sets. One set was treated with heat shock (basal thermotolerance). The other set was incubated at 37 °C for 30 min to induce heat-

shock protein synthesis before heat shock (induced thermotolerance). Cells were heat-shocked at 50 °C for 20 min and immediately chilled on ice. Cells were diluted with sterile water and spotted on YPD plates. Viability was scored after 2 d of incubation at 30 °C.

**Preparation of Hsp104<sub>PI</sub> and Hsp104<sub>PR</sub> Variants.** Two Hsp104 *Strep*-tag variants were made in which the *Strep*-tag is inserted after Ser740 (Hsp104<sub>PI</sub>) or replaced 13 residues of the D2-domain ( $\Delta$ Ser736–Asn748; Hsp104<sub>PR</sub>). Hsp104<sub>PI</sub> and Hsp104<sub>PR</sub> constructs were generated by cassette mutagenesis and expressed and purified as described for other Hsp104 *Strep*-tag variants.

1. Derkatch IL, Bradley ME, Zhou P, Chernoff YO, Liebman SW (1997) Genetic and environmental factors affecting the de novo appearance of the [PSI<sup>+</sup>] prion in *Saccharomyces cerevisiae*. *Genetics* 147(2):507–519.

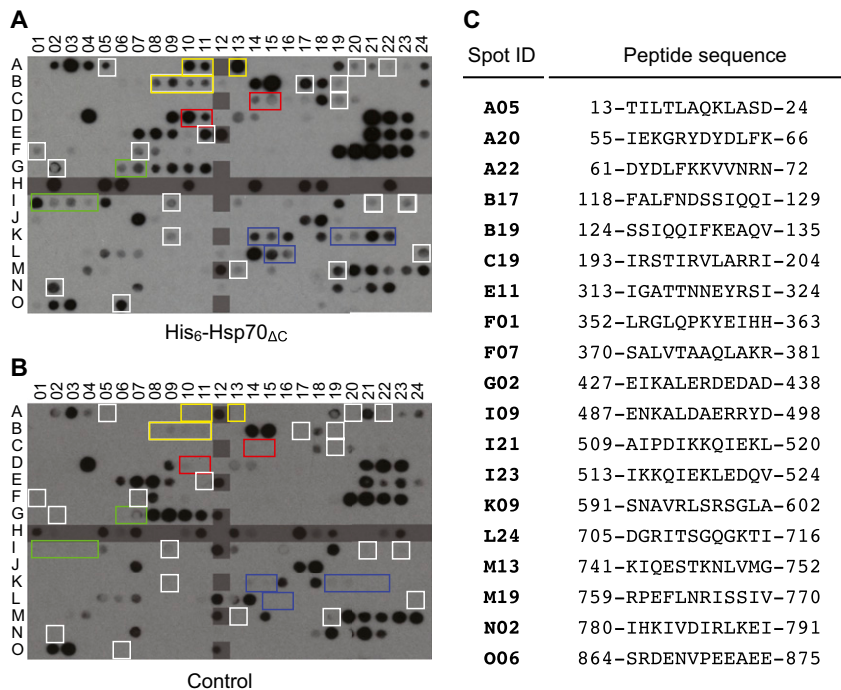

**Fig. S1.** Hsp70-binding peptides identified by peptide array technology. (A) Hsp104 peptide array probed with His<sub>6</sub>-Hsp70<sub>ΔC</sub> and (B) with Hsp70<sub>ΔC</sub> (without His<sub>6</sub>-tag), which functions as a negative control. Overlapping peptides containing at least two consecutive spots are boxed using the same color scheme shown in Fig. 1 B and C. The remaining 19 peptides, which are present as single spots on the membrane, are boxed in white. Peptides that function as either positive or negative internal binding controls, including His<sub>6</sub>- and poly-alanine-containing peptides, are highlighted in gray. (C) Sequences of the 19 Hsp70<sub>ΔC</sub>-binding peptides boxed in white in A.

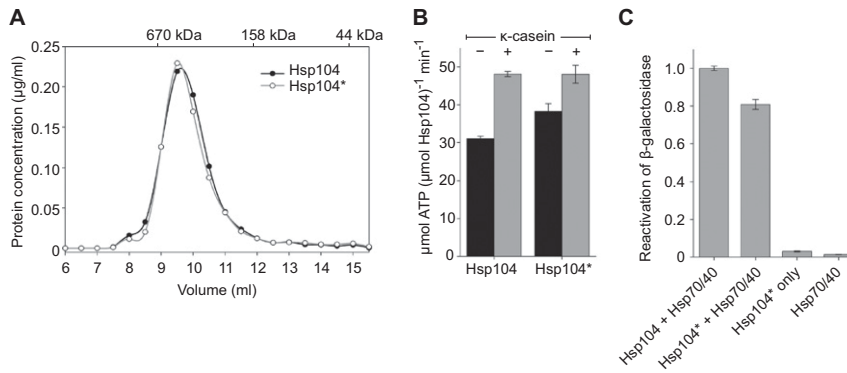

**Fig. S2.** The cysteine-less Hsp104 variant (Hsp104\*) is functional. (A) Hsp104<sub>C209S/C399S/C643S/C876L</sub> (Hsp104\*) forms a hexamer that is indistinguishable from wild-type Hsp104. Hexamers were analyzed on a Superdex 200 10/30 column in 25 mM Hepes (pH 7.5), 150 mM KOAc, 10 mM Mg(OAc)<sub>2</sub>, and 1 mM DTT. (B) Basal and casein-stimulated ATPase activities of Hsp104\* and wild-type Hsp104. (C) Coupled chaperone assay using heat-aggregated β-gal. Recovered enzymatic activities are expressed relative to the wild-type bichaperone system. Averages of three independent measurement ± SD are shown.

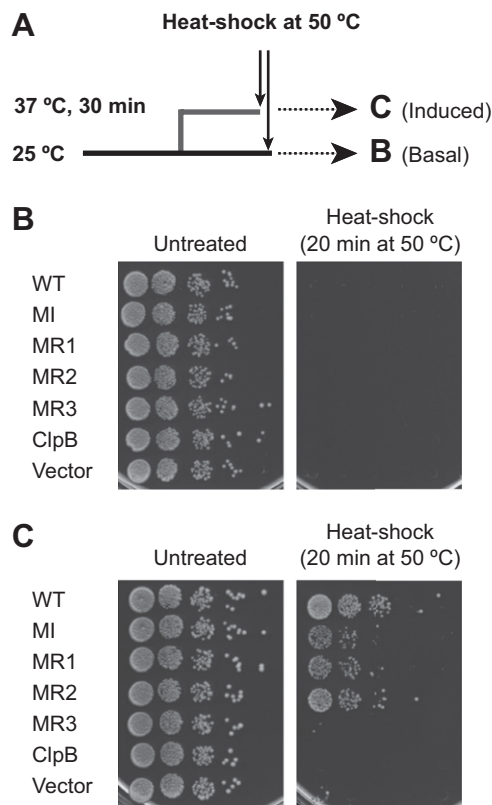

**Fig. S3.** Functional analysis of engineered Hsp104 Strep-tag variants in vivo. (A) Schematic outline of the thermotolerance assay. (B) Basal and (C) induced thermotolerance of  $\Delta hsp104$  yeast expressing the indicated wild-type or mutant protein. Shown are 10-fold serial dilutions.
